# Supplementary material for: Adherence to the Mediterranean Diet and Health-Related Quality of Life during the COVID-19 Lockdown: A Cross-Sectional Study including Preschoolers, Children, and Adolescents from Brazil and Spain
Source: MDPI journal article supplement (doi:10.3390/nu15030677), 2023-01-29
Supplement: s1 [file s1]

**Table S2.** Association between Mediterranean Diet adherence and problems in different dimensions of health-related quality of life by sex and age group.

| HRQoL Domain <sup>a</sup>        | Low/Moderate MD | High MD    | <i>p</i> |
|----------------------------------|-----------------|------------|----------|
| <b>Sex</b>                       |                 |            |          |
| <b>Boys</b>                      |                 |            |          |
| Mobility                         | 2 (5.6)         | 14 (2.6)   | 0.264    |
| Looking after myself             | 3 (8.3)         | 57 (10.6)  | 0.673    |
| Doing usual activities           | 7 (19.4)        | 53 (9.8)   | 0.067    |
| Having pain or discomfort        | 10 (27.8)       | 84 (15.6)  | 0.055    |
| Feeling worried, sad, or unhappy | 13 (36.1)       | 214 (39.7) | 0.669    |
| <b>Girls</b>                     |                 |            |          |
| Mobility                         | -               | 12 (2.5)   | 1.000    |
| Looking after myself             | 5 (12.8)        | 47 (9.7)   | 0.532    |
| Doing usual activities           | 10 (25.6)       | 43 (8.9)   | <0.001   |
| Having pain or discomfort        | 13 (33.3)       | 74 (15.3)  | 0.004    |
| Feeling worried, sad, or unhappy | 19 (48.7)       | 191 (39.6) | 0.266    |
| <b>Age group</b>                 |                 |            |          |
| <b>Preschoolers</b>              |                 |            |          |
| Mobility                         | -               | 6 (4.2)    | 1.000    |
| Looking after myself             | 1 (50.0)        | 36 (25.0)  | 0.420    |
| Doing usual activities           | 1 (50.0)        | 23 (16.0)  | 0.197    |
| Having pain or discomfort        | -               | 17 (11.8)  | 0.605    |
| Feeling worried, sad, or unhappy | 1 (50.0)        | 59 (41.3)  | 1.000    |
| <b>Children</b>                  |                 |            |          |
| Mobility                         | 1 (4.0)         | 6 (1.4)    | 0.335    |
| Looking after myself             | 3 (12.0)        | 25 (6.0)   | 0.228    |
| Doing usual activities           | 8 (32.0)        | 39 (9.3)   | <0.001   |
| Having pain or discomfort        | 8 (32.0)        | 48 (11.5)  | 0.003    |
| Feeling worried, sad, or unhappy | 12 (48.0)       | 154 (36.8) | 0.259    |
| <b>Adolescents</b>               |                 |            |          |
| Mobility                         | 1 (2.1)         | 14 (3.0)   | 1.000    |
| Looking after myself             | 4 (8.3)         | 43 (9.3)   | 0.821    |
| Doing usual activities           | 8 (16.7)        | 34 (7.4)   | 0.026    |
| Having pain or discomfort        | 15 (31.3)       | 93 (20.2)  | 0.074    |
| Feeling worried, sad, or unhappy | 19 (39.6)       | 192 (41.8) | 0.764    |

<sup>a</sup> Data expressed as proportion of participants reporting any problem in the different health-related quality of life domains according to adherence to the Mediterranean diet. HRQoL, health-related quality of life; MD, Mediterranean diet. P values obtained by Pearson's chi-square test or Fisher's exact test.
