# Supplementary material for: Adherence to the Mediterranean Diet and Health-Related Quality of Life during the COVID-19 Lockdown: A Cross-Sectional Study including Preschoolers, Children, and Adolescents from Brazil and Spain
Source: MDPI journal article supplement (doi:10.3390/nu15030677), 2023-01-29
Supplement: s1 [file s1]

**Table S1.** Mediterranean Diet Quality Index in Children and Adolescents.

| Scoring                                                               |
|-----------------------------------------------------------------------|
| Takes a fruit or fruit juice every day (+1)                           |
| Has a second fruit every day (+1)                                     |
| Has fresh or cooked vegetables regularly once a day (+1)              |
| Has fresh or cooked vegetables more than once a day (+1)              |
| Consumes fish regularly (at least 2–3 times per week) (+1)            |
| Goes more than once a week to a fast-food (hamburger) restaurant (–1) |
| Likes pulses and eats them more than once a week (+1)                 |
| Consumes pasta or rice almost every day (5 or more times per week)    |
| Has cereals or grains (bread, etc.) for breakfast (+1)                |
| Consumes nuts regularly (at least 2–3 times per week) (+1)            |
| Uses olive oil at home (+1)                                           |
| Skips breakfast (–1)                                                  |
| Has a dairy product for breakfast (yoghurt, milk, etc.) (+1)          |
| Has commercially baked goods or pastries for breakfast (–1)           |
| Takes two yoghurts and/or some cheese (40 g) daily (+1)               |
| Takes sweets and candy several times every day (–1)                   |
