# Supplementary material for: Adherence to the Mediterranean Diet and Health-Related Quality of Life during the COVID-19 Lockdown: A Cross-Sectional Study including Preschoolers, Children, and Adolescents from Brazil and Spain
Source: Nutrients. 2023 Jan 29;15(3):677. doi: 10.3390/nu15030677 (PMC9920644; doi:10.3390/nu15030677)
Supplement: Supplementary file 1 [file nutrients-15-00677-s001.zip]

Archive with 4 entries (4 files):
- Figure S2.pdf
- Figurea S1.pdf
- Table S1.pdf
- Table S2.pdf
