# Supplementary figures and images for: Adherence to the Mediterranean Diet and Health-Related Quality of Life during the COVID-19 Lockdown: A Cross-Sectional Study including Preschoolers, Children, and Adolescents from Brazil and Spain
Source: MDPI journal article supplement (doi:10.3390/nu15030677), 2023-01-29

**A**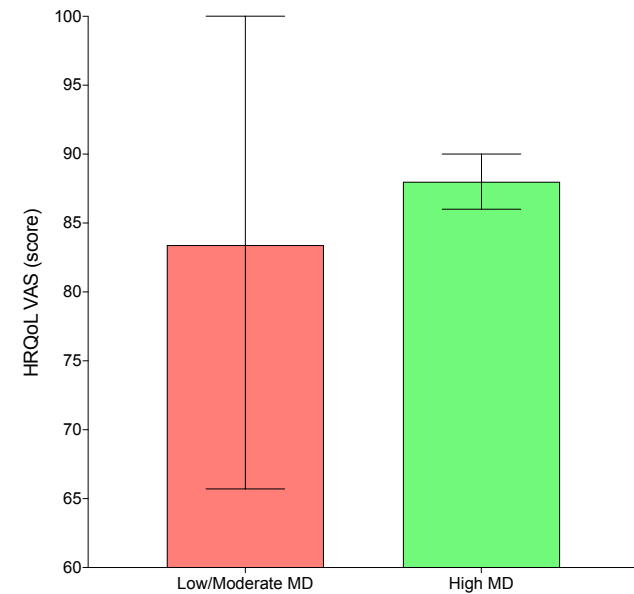**B**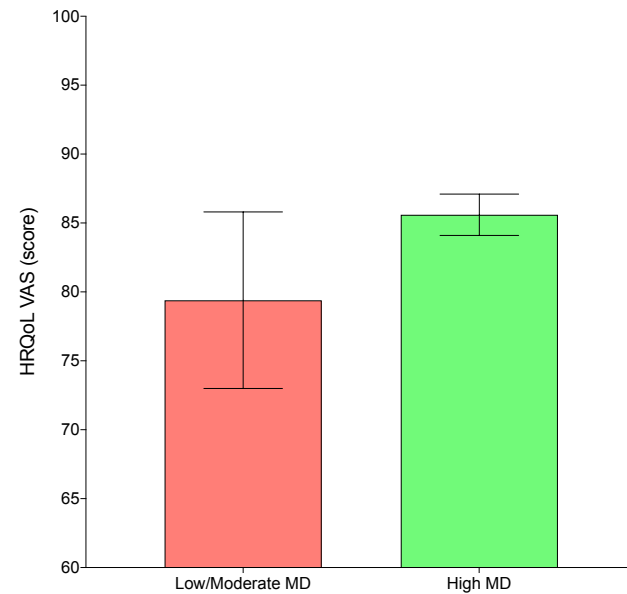**C**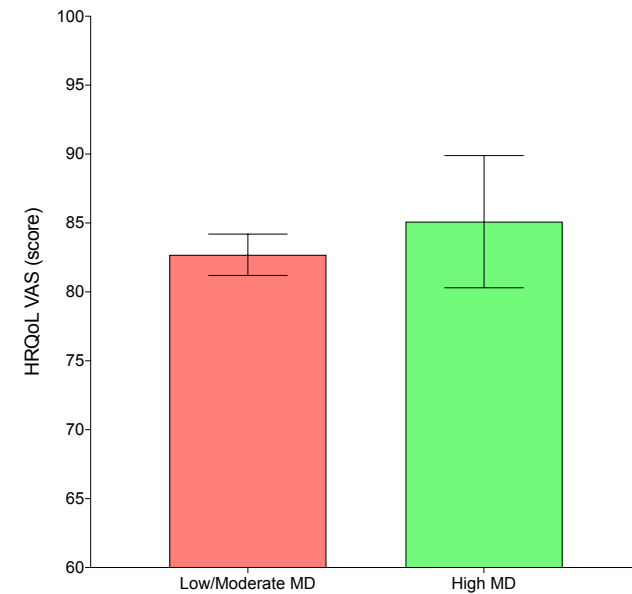

Supplement: s1 [file s1]

**A**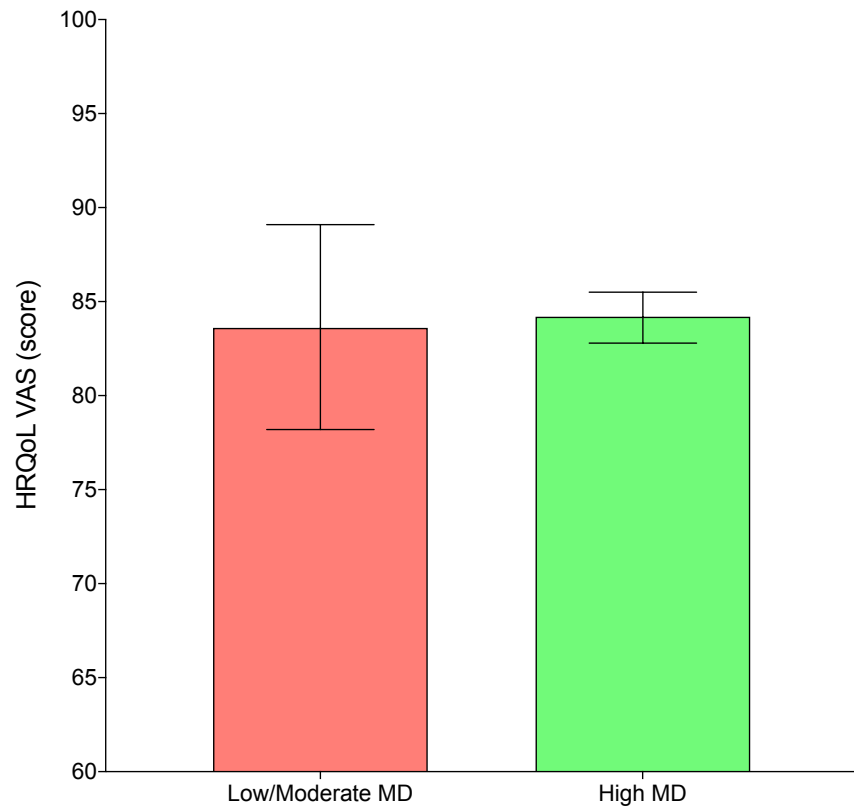**B**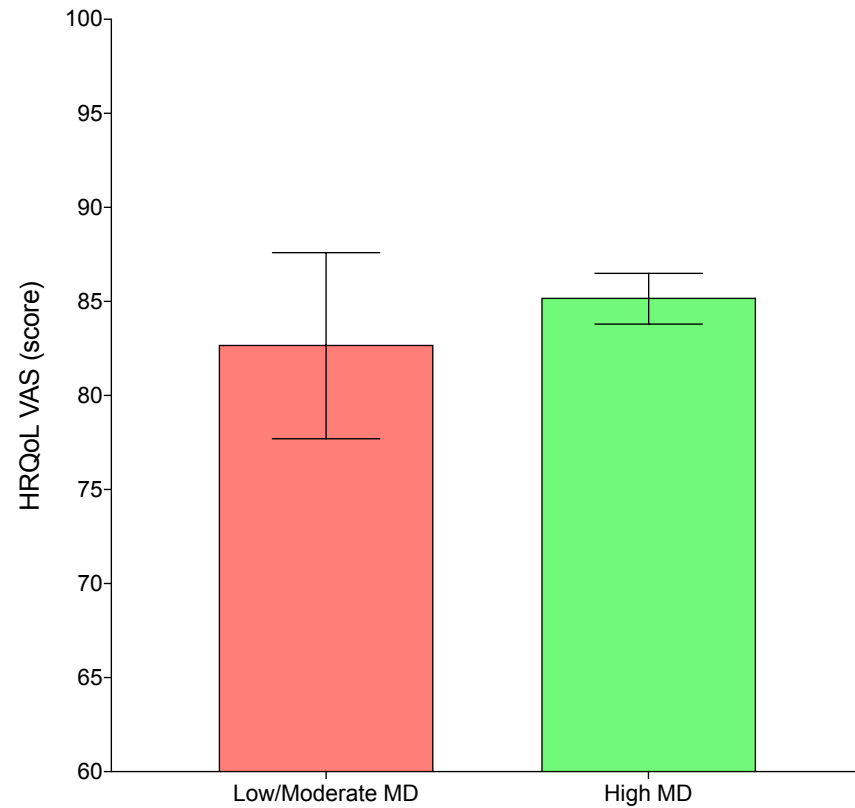

Supplement: s1 [file s1]
